# Supplementary material for: Open-channel microfluidic chip based on shape memory polymer for controllable liquid transport
Source: Royal Society of Chemistry journal article supplement (doi:10.1039/d3lc00027c), 2023-01-01
Supplement: d3lc00027c1.pdf [file d3lc00027c1.pdf]

## Open-channel microfluidic chip based on shape memory polymer for controllable liquid transport

Wen-Qi Ye, Xiao-Peng Liu, Ruo-Fei Ma, Chun-Guang Yang, Zhang-Run Xu\*

*Research Center for Analytical Sciences, Northeastern University, Shenyang, 110819, China.*

\*Corresponding author: Tel.: +86-24-83687659; E-mail: xuzr@mail.neu.edu.cn.

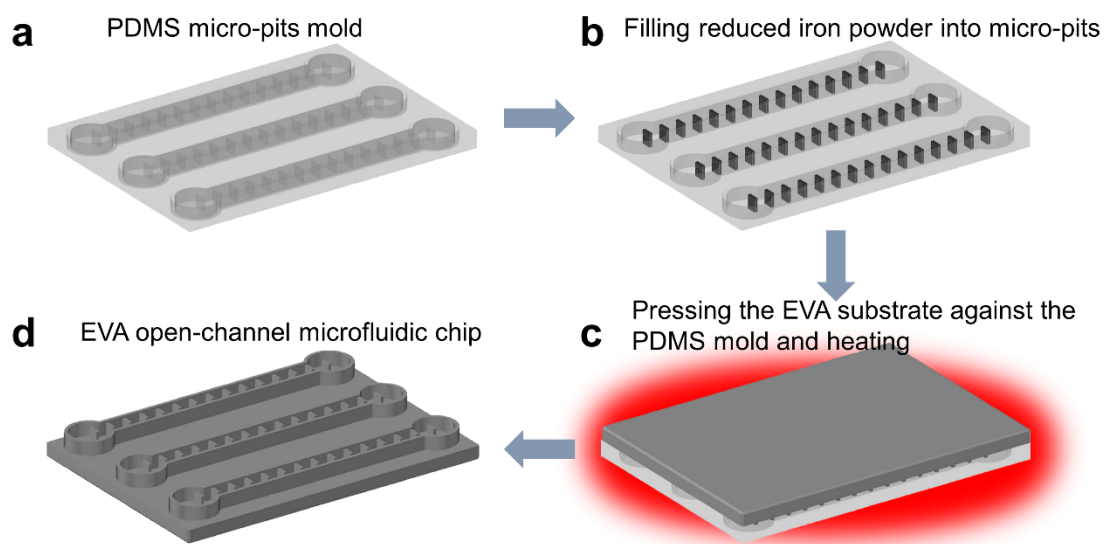

Fig. S1 Fabrication process of the open-channel microfluidic chip. (a) PDMS mold with micro-pit arrays. (b) Filling reduced iron powder into micro-pits. (c) Pressing the EVA substrate against the PDMS mold and thermoforming by heating. (d) The open-channel microfluidic chip obtained by removing the EVA substrate from the PDMS mold.

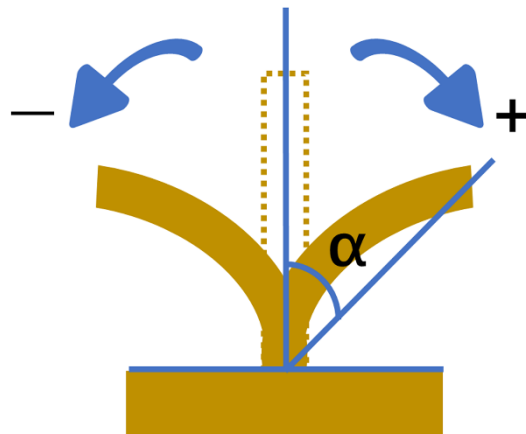

Fig. S2 Schematic diagram of the bending angle of microcolumn.

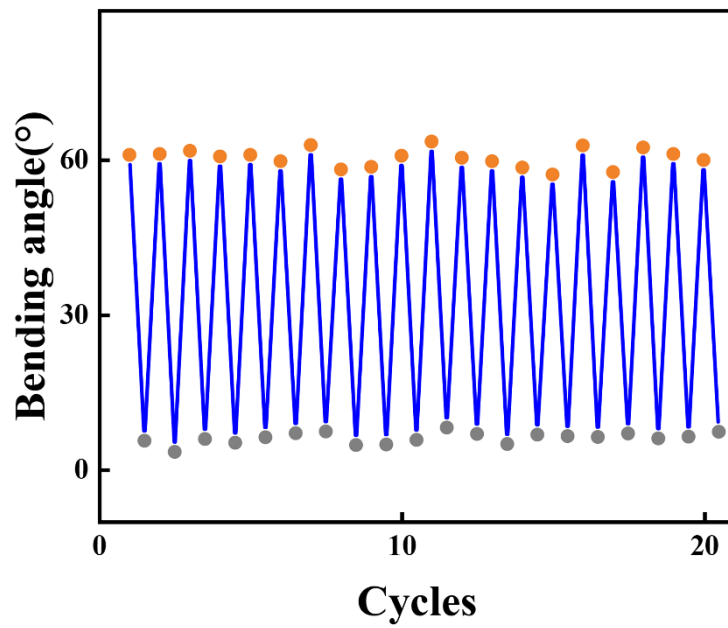

Fig. S3 20 cycles of magnetic-induced tilt and laser-induced recovery to show the reusability of the microcolumn.

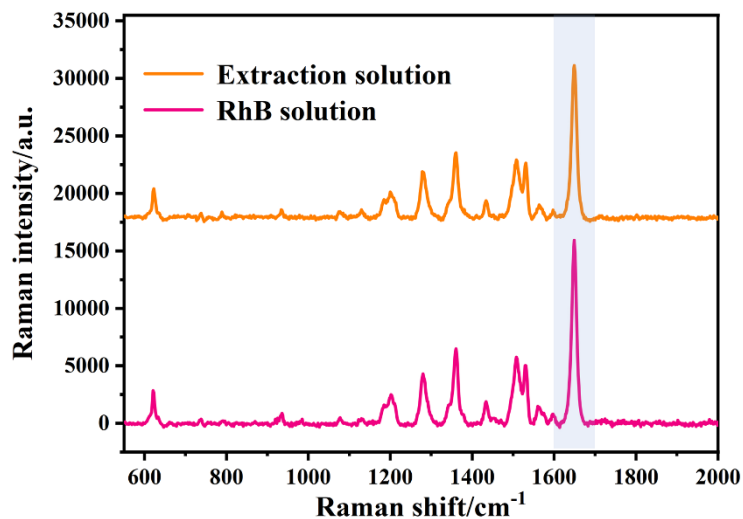

Fig. S4 Raman spectra of 500  $\mu\text{M}$  RhB solution and extraction solution. A total of 3  $\mu\text{L}$  RhB droplet was extracted with 20  $\mu\text{L}$  of n-hexanol in the open channel, and the n-hexanol solution containing RhB was concentrated to about 3  $\mu\text{L}$  and then dropped onto SERS substrate. In addition, 3  $\mu\text{L}$  of RhB droplet (500  $\mu\text{M}$ ) was added to another SERS substrate. Their Raman spectra were measured after they were completely evaporated. The extraction rate was calculated based on the ratio of Raman intensity at 1649  $\text{cm}^{-1}$ .

### Supplementary video

Video S1: Deformation and recovery of microcolumns controlled by NIR laser.
